# Supplementary material for: A Phase 1b Study of Vismodegib with Pirfenidone in Patients with Idiopathic Pulmonary Fibrosis
Source: PubMed Central journal article supplement (PMC6967289; doi:10.1007/s41030-019-0096-8), 2019-07-19
Supplement: 41030_2019_96_MOESM1_ESM.pdf [file 41030_2019_96_MOESM1_ESM.pdf]

**A Phase 1b Study of Vismodegib With Pirfenidone in Patients With Idiopathic Pulmonary  
Fibrosis**

Antje Prasse, Murali Ramaswamy, Shaun Mohan, Lin Pan, Andrew Kenwright, Margaret  
Neighbors, Paula Belloni, Peter P. LaCamera

**SUPPLEMENTARY MATERIAL**

**Additional file**

**Additional file 1: Table S1.** Ethics committees and IRB details. **Table S2.** Combined HRCT and SLB eligibility assessment. **Table S3.** Treatment-emergent adverse events in the safety-evaluable population. **Table S4.** Exposure to vismodegib and pirfenidone. **Table S5.** Vismodegib pharmacokinetics.

**Table S1.** Ethics committees and IRB details.

| <b>Last Name</b> | <b>First Name</b> | <b>Ethics Committee/IRB</b>                              | <b>Address</b>                                                |
|------------------|-------------------|----------------------------------------------------------|---------------------------------------------------------------|
| Central IRB      |                   |                                                          |                                                               |
|                  |                   | Quorum IRB (7 sites)                                     | 1501 Fourth Avenue,<br>Suite 800<br>Seattle, WA 98101         |
| Local IRB        |                   |                                                          |                                                               |
| Cary             | Jeff              | WIRB                                                     | 1019 39 <sup>th</sup> Avenue SE<br>Puyallup, WA, 98374        |
| Chang            | Jacqueline        | Scripps Health IRB                                       | 11025 N. Torrey<br>Pines Rd., Suite 200<br>La Jolla, CA 92037 |
| LaCamera         | Peter             | Steward St.<br>Elizabeth's Medical<br>Center IRB         | 736 Cambridge St<br>Boston, MA 02135                          |
| Lasky            | Joseph A          | Tulane University<br>Human Research<br>Protection Office | 1430 Tulane Avenue<br>TW-36<br>New Orleans, LA<br>70112       |
| Morrow           | Lee               | Creighton University<br>IRB                              | 2500 California Plaza<br>Omaha, NE 68178                      |
| Ramaswamy        | Murali            | Cone Health IRB                                          | 1200 North Elm<br>Street Room 1956<br>Greenboro, NC           |

|       |       |                                                         |                                                                        |
|-------|-------|---------------------------------------------------------|------------------------------------------------------------------------|
|       |       |                                                         | 27401                                                                  |
| Roman | Jesse | University of<br>Louisville Human<br>Subject Protection | 501 E. Broadway<br>MedCenter One,<br>Suite 200<br>Louisville, KY 40202 |

*IRB* Institutional Review Board.

**Table S2.** Combined HRCT and SLB eligibility assessment

|                        | <b>SLB Assessment</b> |                     |                     |                                  |                              |               |
|------------------------|-----------------------|---------------------|---------------------|----------------------------------|------------------------------|---------------|
| <b>HRCT Assessment</b> | <b>Definite UIP</b>   | <b>Probable UIP</b> | <b>Possible UIP</b> | <b>Non-Classifiable Fibrosis</b> | <b>Inconsistent With UIP</b> | <b>No SLB</b> |
| Definite UIP           | Eligible              | Eligible            | Eligible            | Eligible                         | Not eligible                 | Eligible      |
| Possible UIP           | Eligible              | Eligible            | Eligible            | Eligible                         | Not eligible                 | Eligible      |
| Inconsistent with UIP  | Not eligible          | Not eligible        | Not eligible        | Not eligible                     | Not eligible                 | Not eligible  |

*HRCT* high-resolution computed tomography, *SLB* surgical lung biopsy, *UIP* usual interstitial pneumonia

**Table S3.** Treatment-emergent adverse events in the safety-evaluable population

| <b>TEAE, n (%)</b>                     | <b>Vismodegib 150 mg/day +<br/>Pirfenidone ≤ 2403 mg/day<br/>(N = 21)</b> |
|----------------------------------------|---------------------------------------------------------------------------|
| Total patients with ≥ 1 TEAE, n (%)    | 21 (100)                                                                  |
| Muscle spasms                          | 16 (76.2)                                                                 |
| Dysgeusia                              | 13 (61.9)                                                                 |
| Alopecia                               | 7 (33.3)                                                                  |
| Weight decreased                       | 7 (33.3)                                                                  |
| Decreased appetite                     | 6 (28.6)                                                                  |
| IPF                                    | 3 (14.3)                                                                  |
| Nausea                                 | 3 (14.3)                                                                  |
| Blood creatine phosphokinase increased | 2 (9.5)                                                                   |
| Constipation                           | 2 (9.5)                                                                   |
| Diarrhea                               | 2 (9.5)                                                                   |
| Dry skin                               | 2 (9.5)                                                                   |
| Fatigue                                | 2 (9.5)                                                                   |
| Hair growth abnormal                   | 2 (9.5)                                                                   |
| Photosensitivity reaction              | 2 (9.5)                                                                   |
| Rash                                   | 2 (9.5)                                                                   |
| Abdominal pain                         | 1 (4.8)                                                                   |
| Abdominal pain upper                   | 1 (4.8)                                                                   |
| Abnormal loss of weight                | 1 (4.8)                                                                   |
| Arthralgia                             | 1 (4.8)                                                                   |
| Asthenia                               | 1 (4.8)                                                                   |

|                                                    |         |
|----------------------------------------------------|---------|
| Bronchitis                                         | 1 (4.8) |
| Chest pain                                         | 1 (4.8) |
| Chills                                             | 1 (4.8) |
| Cough                                              | 1 (4.8) |
| Dehydration                                        | 1 (4.8) |
| Dry mouth                                          | 1 (4.8) |
| Dyspnea                                            | 1 (4.8) |
| Ear pain                                           | 1 (4.8) |
| Flatulence                                         | 1 (4.8) |
| FVC decreased                                      | 1 (4.8) |
| Gastroesophageal reflux disease                    | 1 (4.8) |
| Gout                                               | 1 (4.8) |
| Headache                                           | 1 (4.8) |
| Hemoglobin increased                               | 1 (4.8) |
| Hemoptysis                                         | 1 (4.8) |
| Hypoacusis                                         | 1 (4.8) |
| Hypotension                                        | 1 (4.8) |
| Hypoxia                                            | 1 (4.8) |
| Increased appetite                                 | 1 (4.8) |
| Increased viscosity of upper respiratory secretion | 1 (4.8) |
| Influenza                                          | 1 (4.8) |
| Iron deficiencies                                  | 1 (4.8) |
| Laceration                                         | 1 (4.8) |
| Lip blister                                        | 1 (4.8) |
| Liver function test increased                      | 1 (4.8) |

|                                   |         |
|-----------------------------------|---------|
| Loss of libido                    | 1 (4.8) |
| Lung infection                    | 1 (4.8) |
| Memory impairment                 | 1 (4.8) |
| Parainfluenza virus infection     | 1 (4.8) |
| Pneumonia                         | 1 (4.8) |
| Pruritus                          | 1 (4.8) |
| Pulmonary embolism                | 1 (4.8) |
| Pyrexia                           | 1 (4.8) |
| Respiratory tract infection       | 1 (4.8) |
| Rhinitis                          | 1 (4.8) |
| Rhinorrhea                        | 1 (4.8) |
| Skin hemorrhage                   | 1 (4.8) |
| Skin injury                       | 1 (4.8) |
| Stomatitis                        | 1 (4.8) |
| Toothache                         | 1 (4.8) |
| Upper respiratory tract infection | 1 (4.8) |
| Ventricular extrasystoles         | 1 (4.8) |
| Vomiting                          | 1 (4.8) |

*FVC* forced vital capacity, *IPF* idiopathic pulmonary fibrosis, *TEAE* treatment-emergent adverse event



**Table S4.** Exposure to vismodegib and pirfenidone

|                                      | <b>Vismodegib 150 mg/day +<br/>Pirfenidone ≤ 2403 mg/day<br/>(N = 21)</b> |
|--------------------------------------|---------------------------------------------------------------------------|
| <b>Vismodegib 150 mg/day</b>         |                                                                           |
| Treatment duration, mean (SD), weeks | 19.2 (6.6)                                                                |
| Dose intensity, mean (SD), %         | 77.64 (27.07)                                                             |
| <b>Pirfenidone ≤ 2403 mg/day</b>     |                                                                           |
| Treatment duration, mean (SD), weeks | 22.9 (6.6)                                                                |

*SD* standard deviation

**Table S5.** Vismodegib pharmacokinetics

| <b>Vismodegib<br/>Concentration, Mean (SD),<br/>µg/mL</b> | <b>C<sub>min</sub>, Week 4<br/>(n = 20)</b> | <b>C<sub>min</sub>, Week 12<br/>(n = 20)</b> | <b>C<sub>min</sub>, Week 24<br/>(n = 15)</b> | <b>SFU, Week 30<br/>(n = 15)</b> |
|-----------------------------------------------------------|---------------------------------------------|----------------------------------------------|----------------------------------------------|----------------------------------|
| Total                                                     | 9.39 (2.32)                                 | 8.29 (3.27)                                  | 7.09 (4.57)                                  | 1.18 (1.65)                      |
| Free                                                      | 0.09 (0.04)                                 | 0.08 (0.05)                                  | 0.07 (0.06)                                  | 0.01 (0.01) <sup>a</sup>         |

*C<sub>min</sub>* concentration at 24 ± 0.17 hours following the most recent dose, *SD* standard deviation,

*SFU* plasma vismodegib concentration at Day 30 after last dose

<sup>a</sup> n = 12
